# Supplementary material for: Patterns of anxiety and distress over 12 months following participation in HPV primary screening
Source: HighWire-hosted journal article supplement (doi:10.1136/sextrans-2020-054780), 2021-08-03
Supplement: sextrans-2020-054780supp001_data_supplement.pdf [file sextrans-2020-054780supp001_data_supplement.pdf]

Supplementary Figure S1: Longitudinal study flow diagram

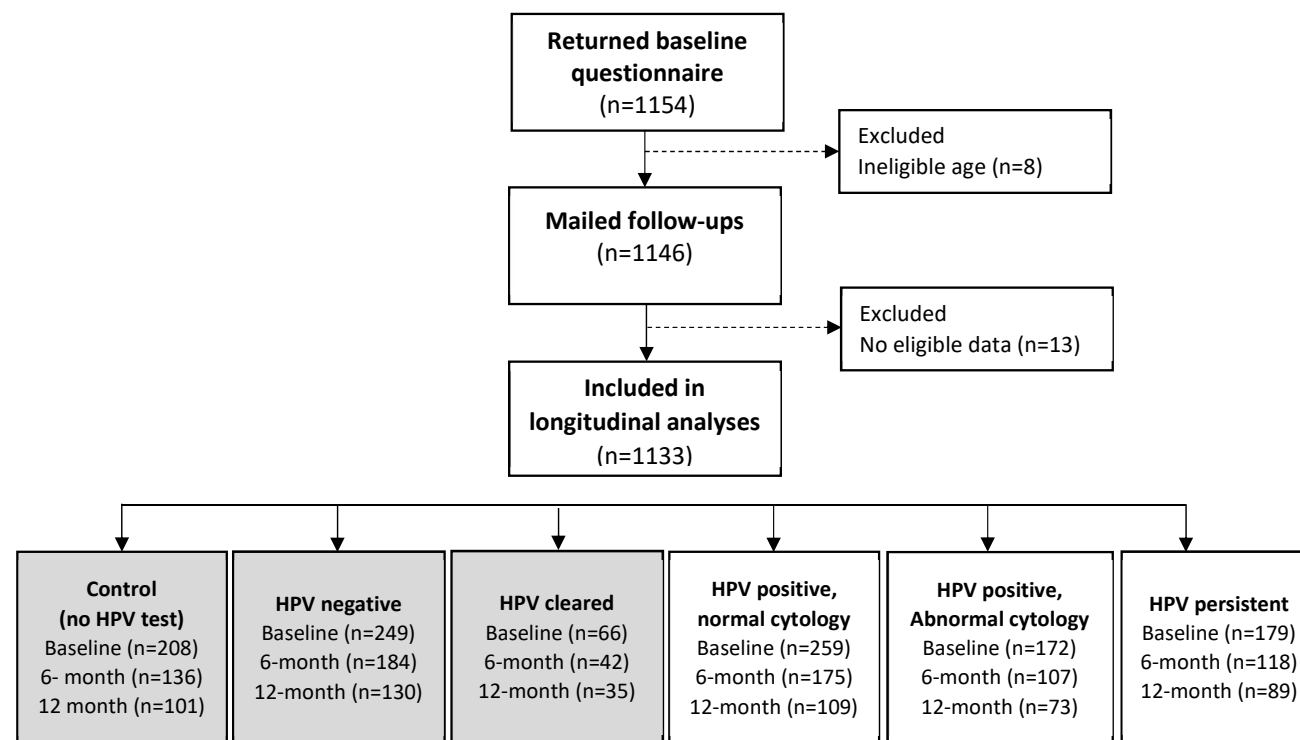

Note 1: Women who were HPV persistent and HPV cleared had tested HPV positive ~1 year earlier and the baseline questionnaire was following their early recall result

Note 2: The overall baseline sample size was slightly greater than reported in McBride et al. (10) due to delayed data entry for six questionnaires.

Note 2: The three groups shaded grey represent the control group for the follow-up analyses

**Supplementary Table S1: Attrition scenarios (n=1133)**

|                                | n (%)      |
|--------------------------------|------------|
| Data at baseline only          | 290 (25.6) |
| Data at baseline and 6-months  | 306 (27.0) |
| Data at baseline and 12 months | 81 (7.1)   |
| Data at all three time points  | 456 (40.2) |

**Supplementary Table S2: Changes in mean anxiety and distress from baseline to 6 and 12 months by result group**

|                             | Control | HPV positive,<br>normal  | HPV positive,<br>abnormal | HPV persistent   |
|-----------------------------|---------|--------------------------|---------------------------|------------------|
| <b>Anxiety<sup>a</sup></b>  |         |                          |                           |                  |
| From baseline to 6 months   | Ref     | -1.7 (-4.6, 1.3)         | <b>-6.4 (-10.4, -2.4)</b> | -2.6 (-6.0, 0.7) |
| From baseline to 12 months  | Ref     | <b>-3.6 (-7.0, -0.2)</b> | <b>-7.4 (-12.1, -2.8)</b> | -1.9 (-6.0, 2.1) |
| <b>Distress<sup>a</sup></b> |         |                          |                           |                  |
| From baseline to 6 months   | Ref     | -0.5 (1.3, 0.3)          | <b>-1.0 (-2.0, -0.01)</b> | -0.3 (-1.2, 0.5) |
| From baseline to 12 months  | Ref     | -0.5 (-1.4, 0.3)         | <b>-1.1 (-2.1, -0.09)</b> | 0.1 (-0.9, 1.0)  |

Fully adjusted for age, marital status, ethnicity, index of multiple deprivation (IMD), education, number of previous screens and NHS site. Weighted by age group and IMD quintile. Multiple imputation used to account for missing data. Bold indicates significance.

**Supplementary Table S3: Primary and secondary outcomes by self-reported re-attendance at recall**

|                                  | HPV positive, normal (n=109)     |                                  |                                            | p-value | HPV persistent (n=89)            |                                 |                                            | p-value |
|----------------------------------|----------------------------------|----------------------------------|--------------------------------------------|---------|----------------------------------|---------------------------------|--------------------------------------------|---------|
|                                  | Re-attended, HPV positive (n=39) | Re-attended, HPV negative (n=31) | Not re-attended/ Not sure of result (n=33) |         | Re-attended, HPV positive (n=43) | Re-attended, HPV negative (n=9) | Not re-attended/ Not sure of result (n=35) |         |
| STAI score (mean; SD)            | <b>37.7 (12.7)</b>               | <b>31.1 (10.7)</b>               | <b>40.0 (17.0)</b>                         | .023    | 39.5 (12.6)                      | 31.5 (9.8)                      | 34.8 (10.8)                                | .081    |
| GHQ score (mean; SD)             | 1.7 (3.1)                        | 2.0 (3.0)                        | 2.9 (3.9)                                  | .345    | 2.8 (3.2)                        | 2.5 (3.5)                       | 1.9 (3.0)                                  | .425    |
| Higher worry about cancer: n (%) | <b>21 (53.8)</b>                 | <b>5 (13.2)</b>                  | <b>10 (33.3)</b>                           | .001    | 14 (33.3)                        | 4 (30.8)                        | 9 (28.1)                                   | .891    |
| Higher concern: n (%)            | <b>14 (35.9)</b>                 | <b>4 (10.5)</b>                  | <b>6 (20.0)</b>                            | .026    | 10 (23.8)                        | 2 (15.4)                        | 6 (18.8)                                   | .761    |
| Higher reassurance: n (%)        | <b>20 (52.6)</b>                 | <b>32 (88.9)</b>                 | <b>14 (46.7)</b>                           | <.001   | 27 (64.3)                        | 9 (75.0)                        | 18 (56.3)                                  | .499    |

Data shown for HPV positive, normal cytology and HPV persistent women only who would have been invited for a recall appointment around the time of the 12-month questionnaire.

Unweighted and unadjusted analyses. Bold indicates significance at  $p < .05$ .
